# Supplementary material for: Coordination chemistry of platinum and palladium in the solid-state: Synthesis of imidazole and pyrazole complexes
Source: Royal Society of Chemistry journal article supplement (doi:10.1039/b919665j), 2010-01-01

**Supporting information for:**

**Coordination Chemistry of Platinum and Palladium in the Solid-State: Controlled Synthesis of Imidazole and Pyrazole Complexes.**

Christopher J. Adams,\* Mairi F. Haddow, Robert J. I. Hughes, Mukhtar A. Kurawa and  
A. Guy Orpen

School of Chemistry, University of Bristol, Bristol BS8 1TS

*Email: chcja@bris.ac.uk*

## 1. XRPD patterns

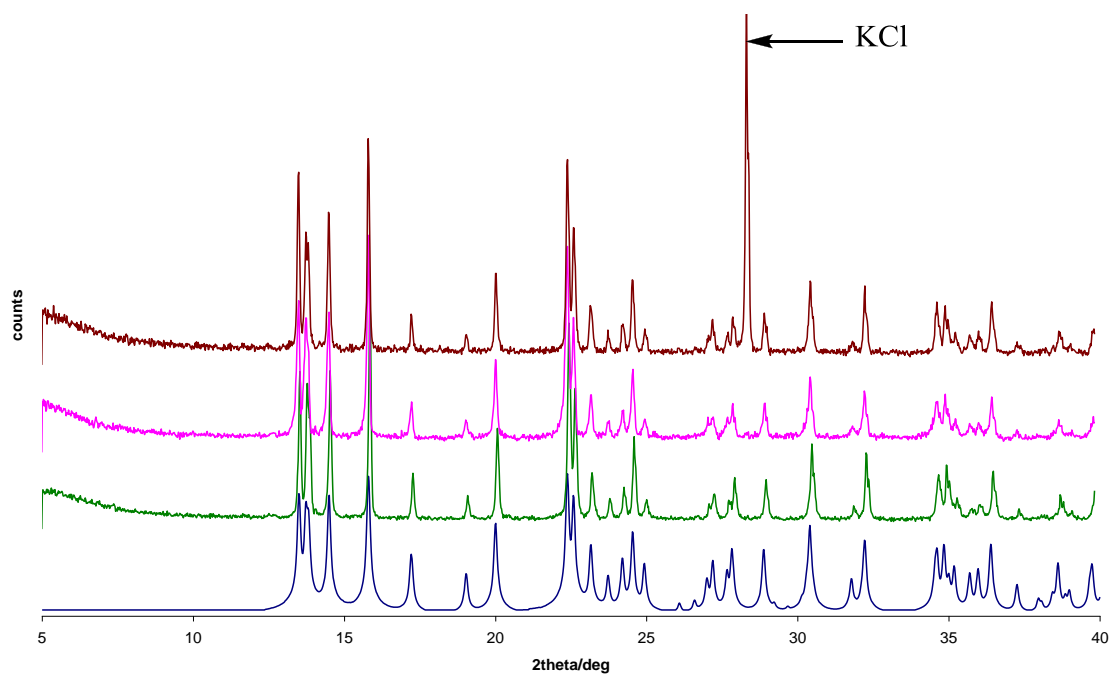

XRPD for  $[\text{H}_2\text{im}]_2[\text{PdCl}_4]$  **1**. Dark blue = calculated from RORVOJ;<sup>13</sup> green = mechanochemical using  $\text{PdCl}_2$ ; pink = HCl absorption by  $[\text{PdCl}_2(\text{Him})_2]$ ; brown = mechanochemical using  $\text{K}_2\text{PdCl}_4$ .

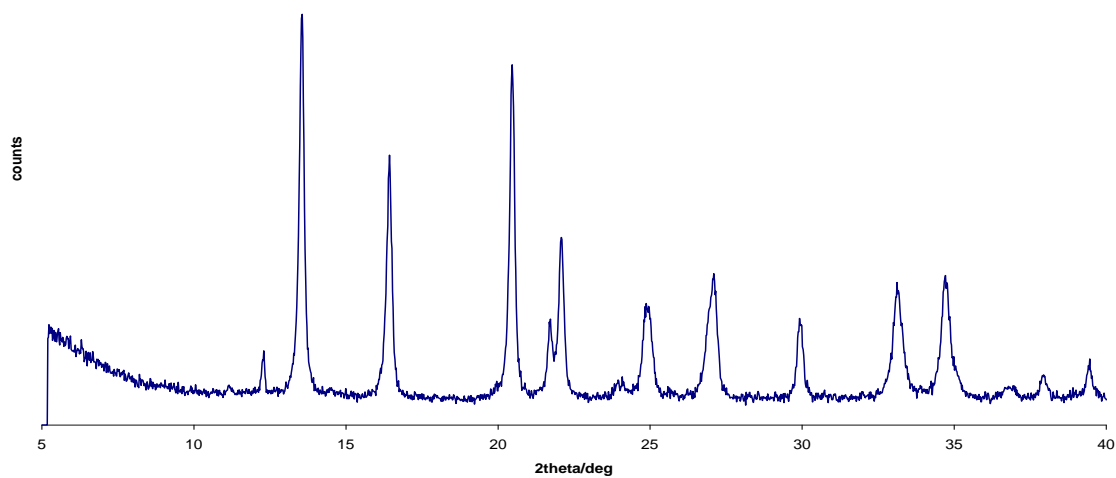

XRPD pattern for  $\text{cis}-[\text{PdCl}_2(\text{Him})_2]$  **2**.

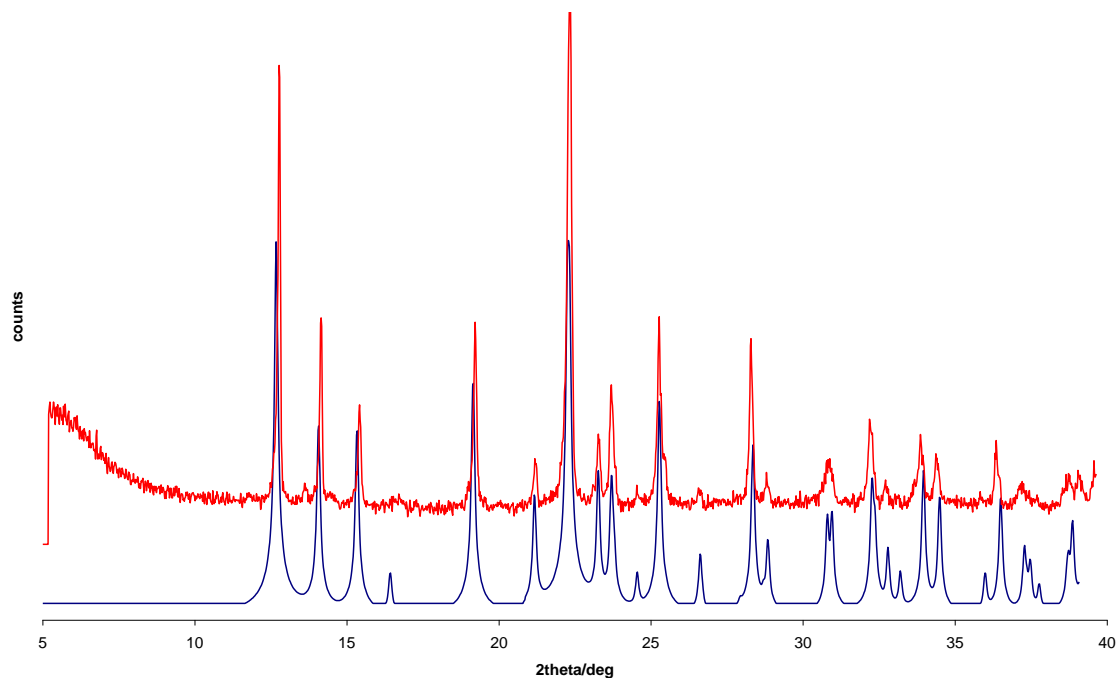

XRPD pattern for *trans*-[PdCl<sub>2</sub>(Him)<sub>2</sub>] **3**. Blue = calculated from the crystal structure; red = sample formed by thermal elimination from **1**.

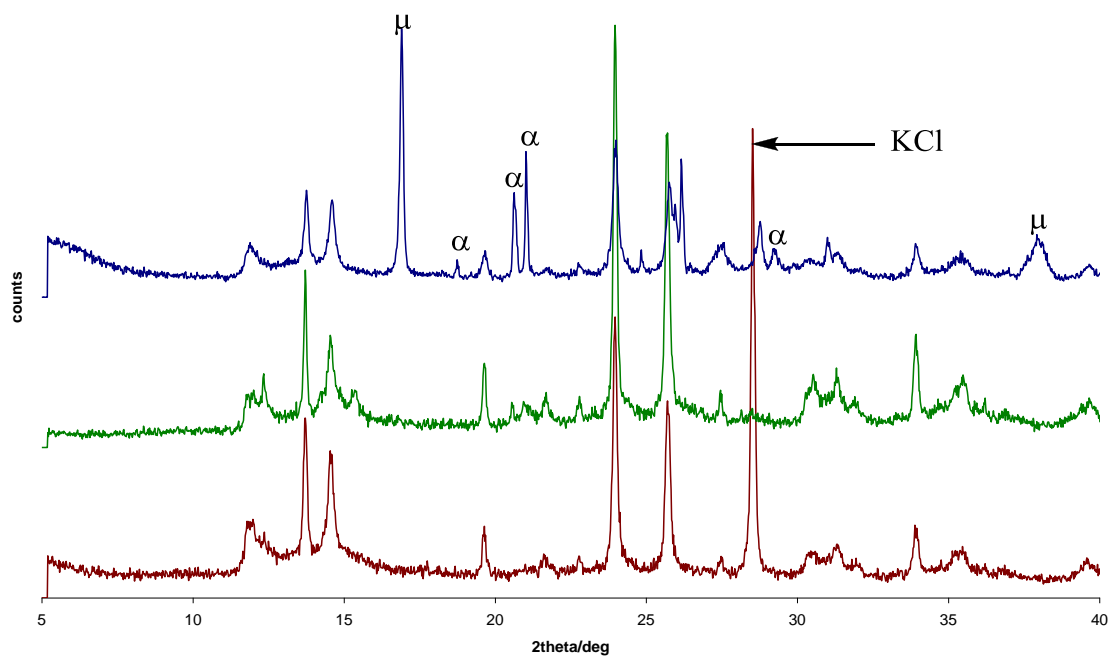

XRPD pattern for [Pd(Him)<sub>4</sub>]Cl<sub>2</sub> **4**. Brown = K<sub>2</sub>PdCl<sub>4</sub> + 4Him; green = PdCl<sub>2</sub> + 4Him; blue = PdCl<sub>2</sub> + 2Him. Key:  $\mu$  = PdCl<sub>2</sub>;  $\alpha$  = Him.

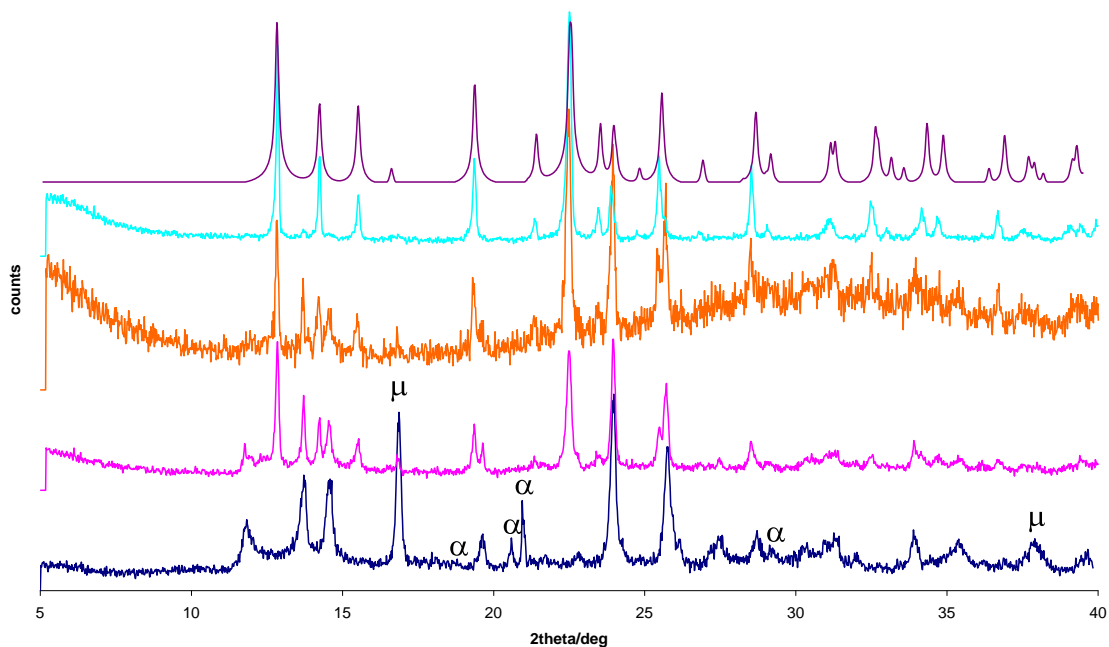

XRPD pattern for  $[\text{Pd}(\text{Him})_4]\text{Cl}_2$  **4**. Blue =  $\text{PdCl}_2 + 2\text{Him}$  (0 months); pink = 6 months; orange = 10 months; turquoise = *trans*- $[\text{PdCl}_2(\text{Him})_2]$  **3**; violet = calculated from the crystal structure of **3**. Key:  $\mu$  =  $\text{PdCl}_2$ ;  $\alpha$  = Him.

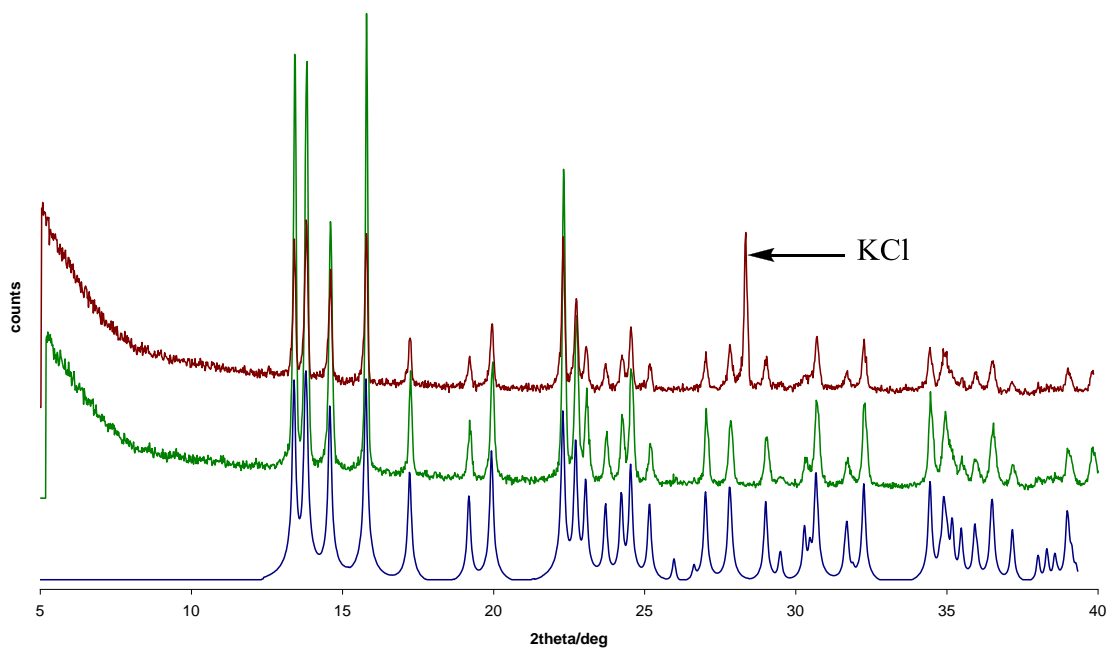

XRPD pattern for  $[\text{PtCl}_4][\text{H}_2\text{im}]_2$  **5**. Blue = calculated from the crystal structure; green = mechanochemical using  $\text{PtCl}_2$ ; brown = mechanochemical using  $\text{K}_2\text{PtCl}_4$ .

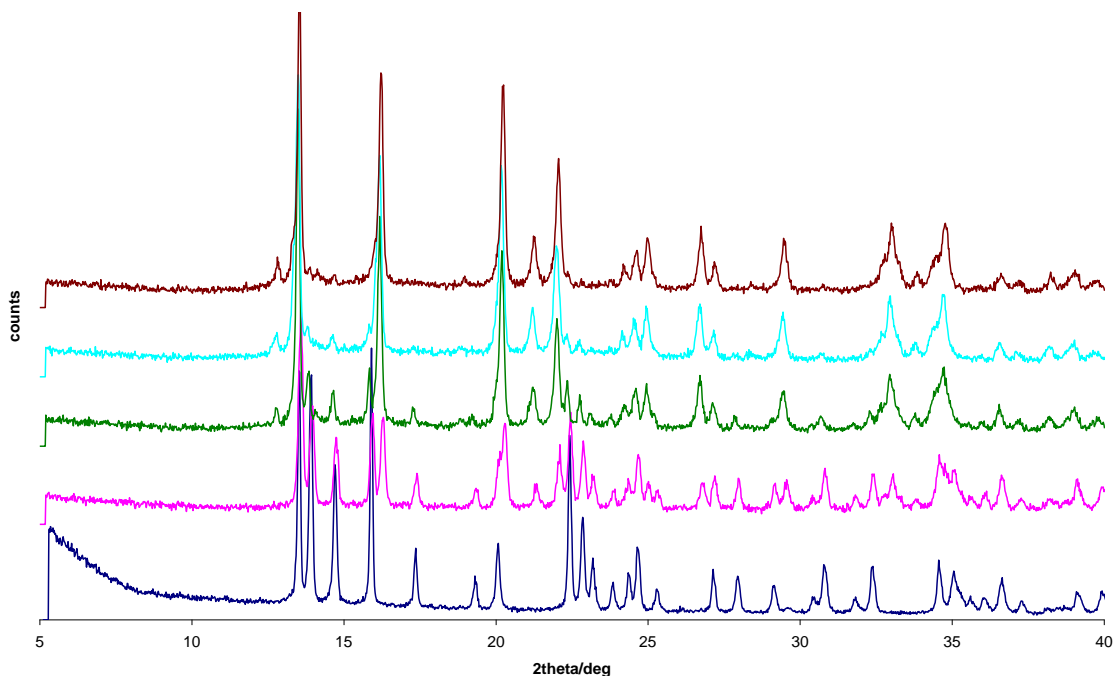

XRPD patterns for thermal conversion of  $[\text{H}_2\text{im}]_2[\text{PtCl}_4]$  **5** to *cis*- $[\text{PtCl}_2(\text{Him})_2]$  **6**. Blue = 0 hours; pink = 12 hours; green = 40 hours; turquoise = 66 hours; brown = 120 hours.

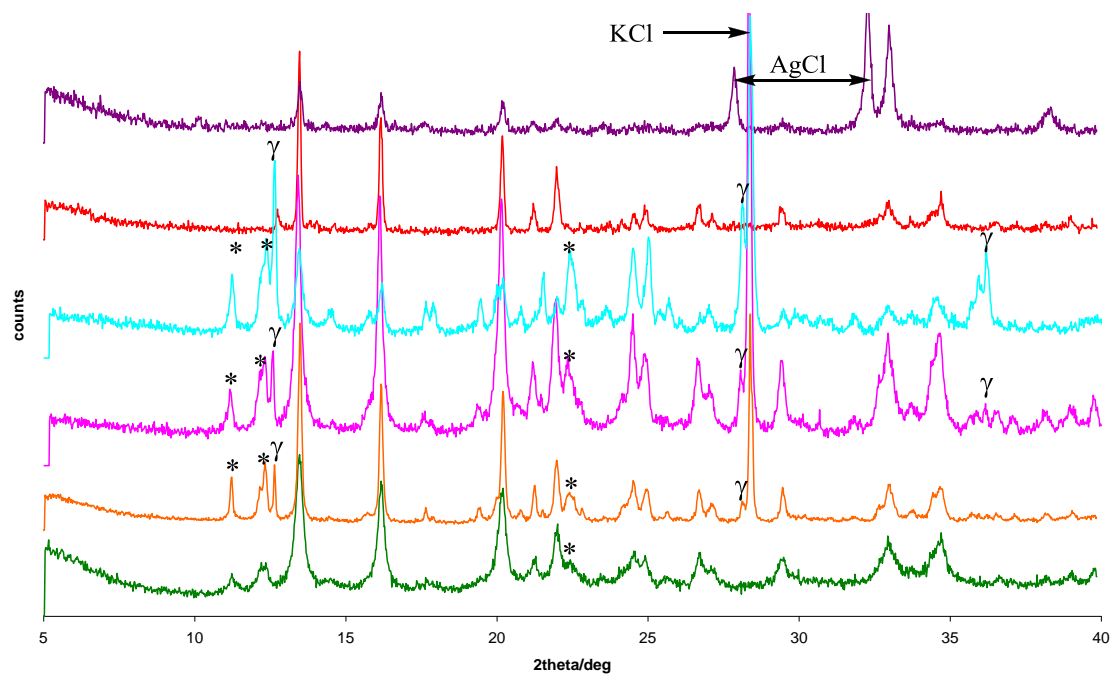

XRPD for *cis*- $[\text{PtCl}_2(\text{Him})_2]$  **6**. Green =  $\text{PtCl}_2 + 2\text{Him}$ ; orange =  $\text{K}_2\text{PtCl}_4 + 2\text{Him}$ ; pink = **5** +  $2\text{KOH}$ ; turquoise = **5** +  $2t\text{-BuOK}$ ; red = thermal elimination; violet = **5** +  $\text{Ag}_2\text{O}$ . Key:  $\gamma$  = peaks from  $\text{K}_2\text{PtCl}_4$ ; \* = unknown by-product.

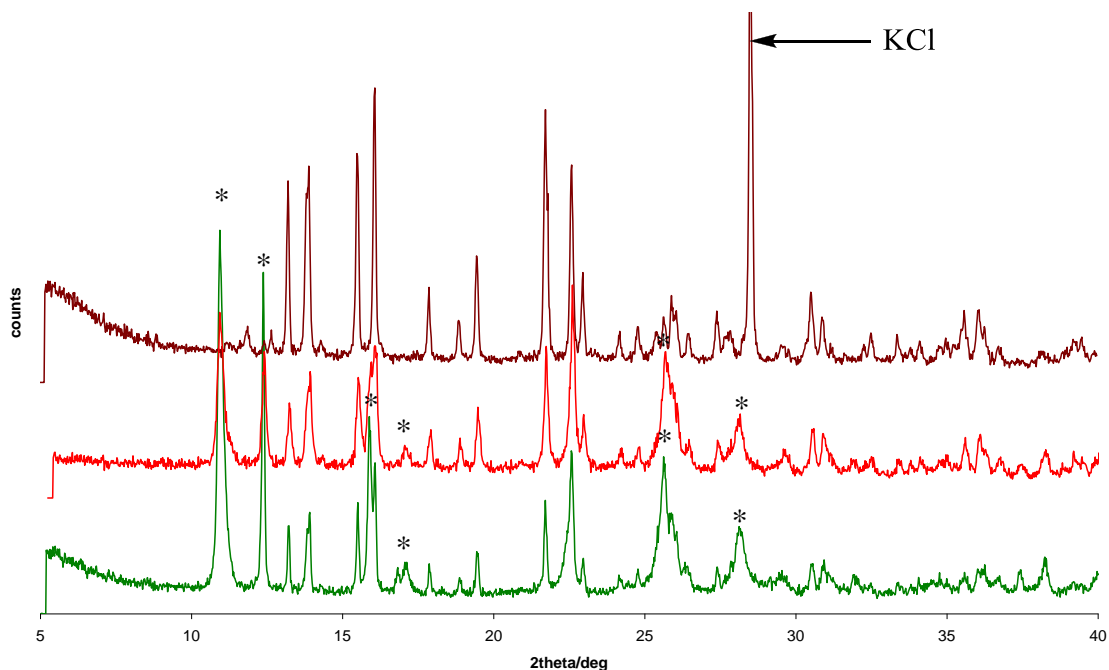

XRPD for  $[\text{H}_2\text{pz}]_2[\text{PdCl}_4]$  **7**. Green = mechanochemical syntheses; red = HCl gas absorption by **9**; brown =  $\text{K}_2\text{PdCl}_4 + 2[\text{H}_2\text{pz}]\text{Cl}$ . \* = peaks from **8**.

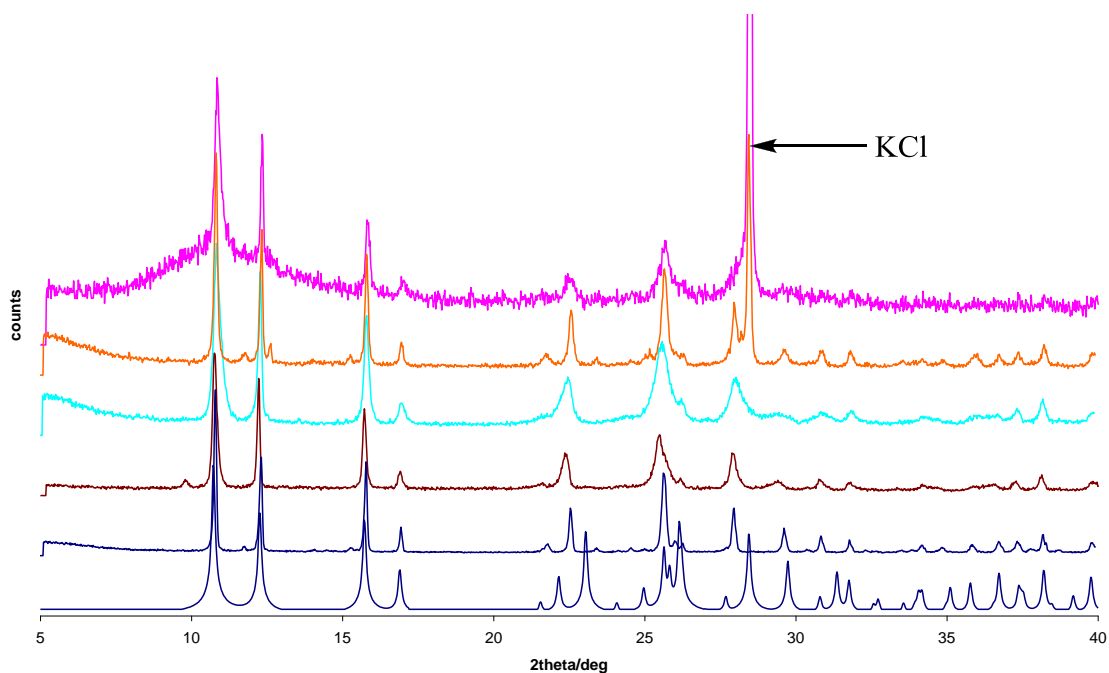

XRPD for *trans*- $[\text{PdCl}_2(\text{Hpz})_2]$  **8**. Dark blue = calculated from the structure; blue = solution synthesis; brown = thermal elimination from **7**; turquoise =  $\text{Pd}(\text{OAc})_2 + 2[\text{H}_2\text{pz}]\text{Cl}$ ; orange =  $\text{K}_2\text{PdCl}_4 + 2\text{Hpz}$  (ball milling); pink = **7** + *t*-BuOK.

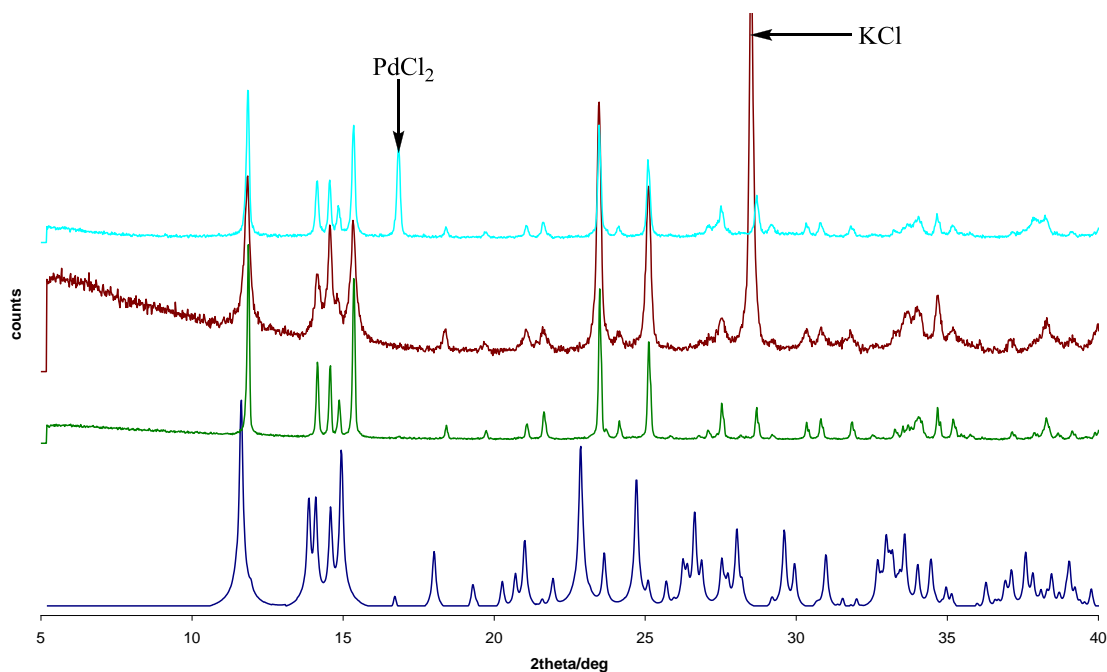

XRPD for  $[\text{Pd}(\text{Hpz})_4]\text{Cl}_2$  **9**. Dark blue = calculated from the crystal structure of a hydrate of **9**; green =  $\text{PdCl}_2 + 4\text{Hpz}$ ; brown =  $\text{K}_2\text{PdCl}_4 + 4\text{Hpz}$ ; turquoise =  $\text{PdCl}_2 + 2\text{Hpz}$ .

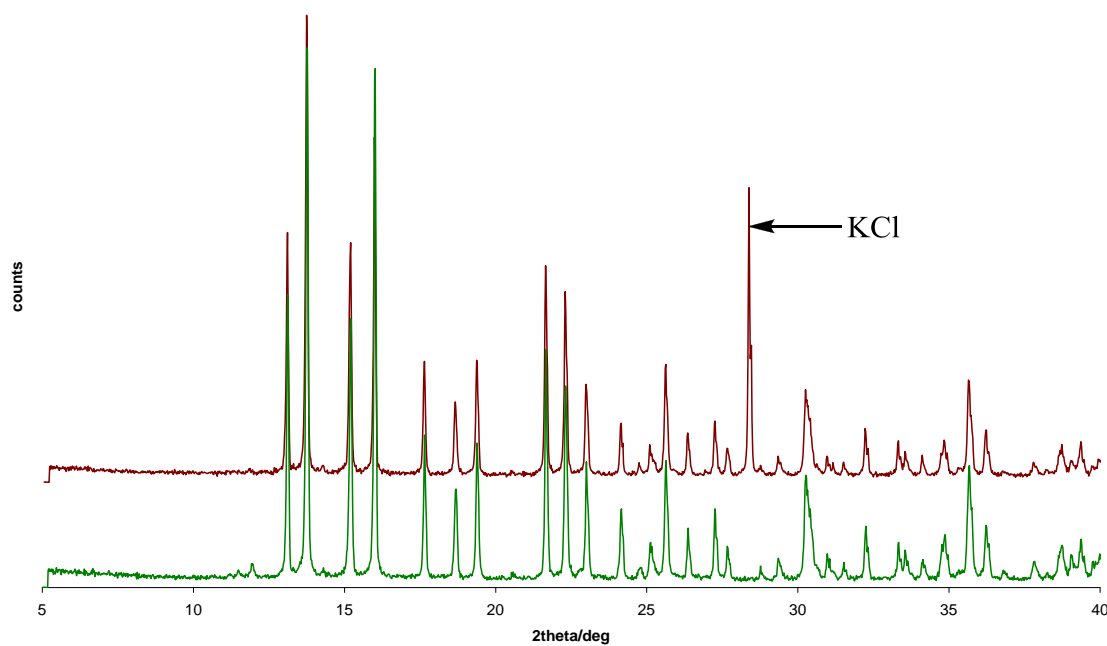

XRPD patterns for mechanochemical syntheses of  $[\text{H}_2\text{pz}]_2[\text{PtCl}_4]$  **10**. Green =  $\text{PtCl}_2 + 2[\text{H}_2\text{pz}]\text{Cl}$ ; brown =  $\text{K}_2\text{PtCl}_4 + 2[\text{H}_2\text{pz}]\text{Cl}$ .

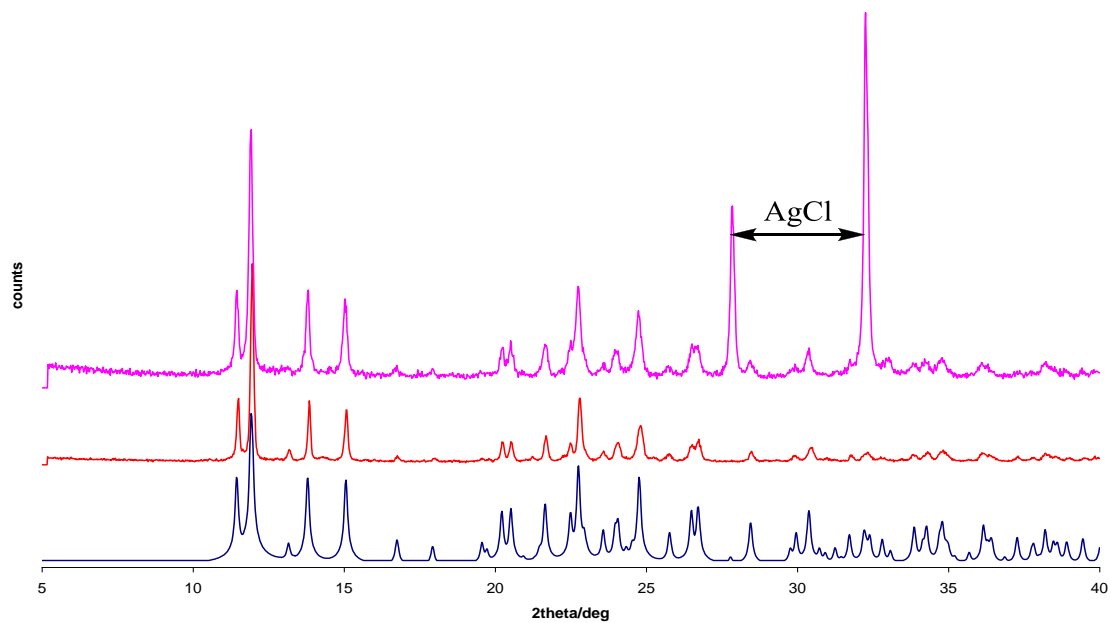

XRPD patterns for *cis*-[PtCl<sub>2</sub>(Hpz)<sub>2</sub>] **11**. Blue = calculated from the crystal structure of VAZWEY01; red = thermal elimination from [H<sub>2</sub>Pz]<sub>2</sub>[PtCl<sub>4</sub>] **10**; pink = **10** + Ag<sub>2</sub>O.

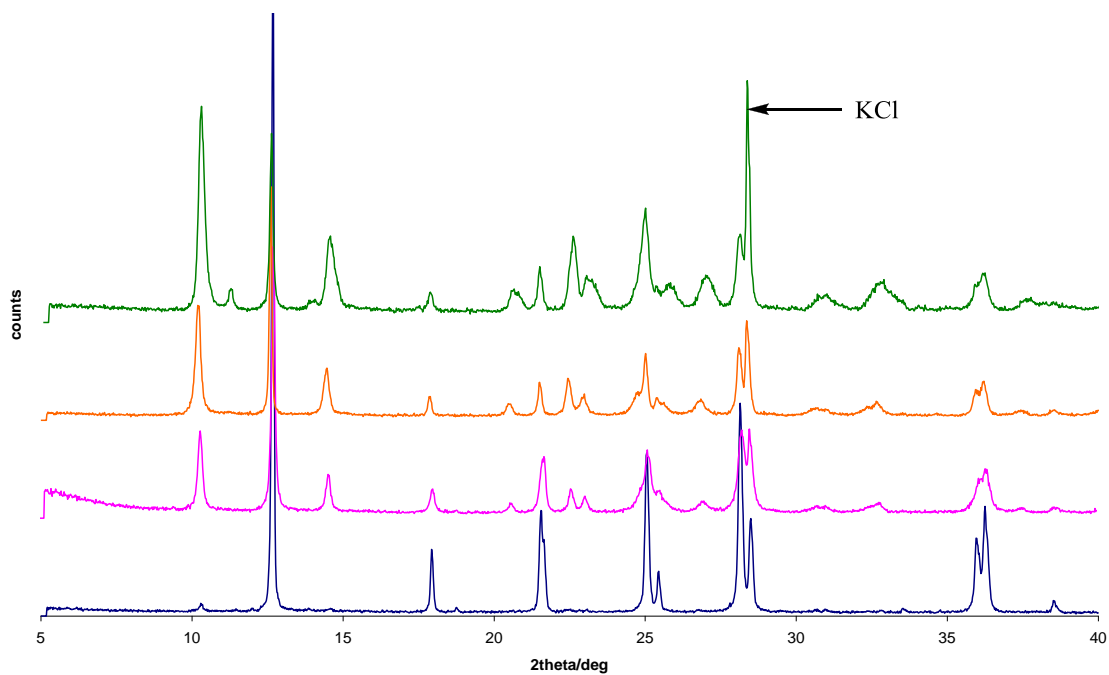

XRPD pattern for the grinding reaction of K<sub>2</sub>PtCl<sub>4</sub> + 2Hpz. Blue = 0 days; pink = 5 days; orange = 7 months; green = 12 months.



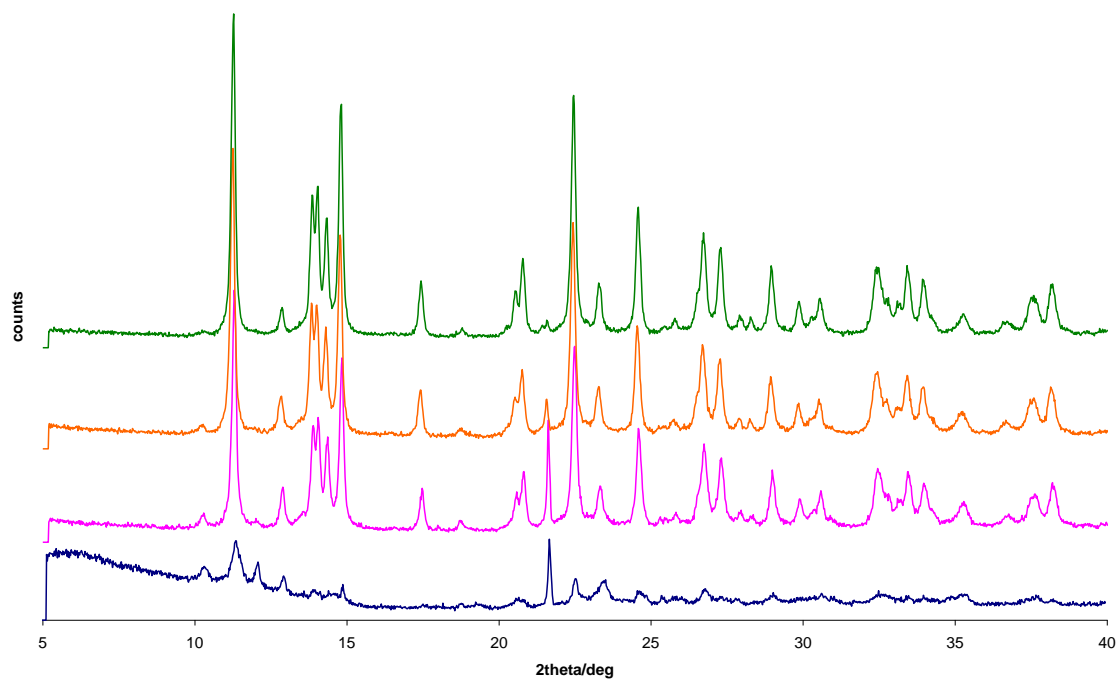

XRPD patterns for [Pt(Hpz)<sub>4</sub>]Cl<sub>2</sub>·H<sub>2</sub>O **12**. Blue = PtCl<sub>2</sub> + 4Hpz (0 days); pink = 5 days; orange = 6 days; green = 13 days.

## 2. Hydrogen bonds

**Table HB1:** Hydrogen-bonding geometry for **5** [Å and °].

| D-H...A                  | d(D-H) | d(H...A) | d(D...A) | <(DHA) |
|--------------------------|--------|----------|----------|--------|
| N1-H1...Cl1 <sup>A</sup> | 1.06   | 2.55     | 3.40     | 136.4  |
| N1-H1...Cl2 <sup>A</sup> | 1.06   | 2.32     | 3.13     | 132.6  |
| N2-H2...Cl2 <sup>B</sup> | 1.07   | 2.45     | 3.33     | 138.0  |

Symmetry transformations used to generate equivalent atoms: <sup>A</sup> x,y-1,z <sup>B</sup> x,y,z+1.

**Table HB2:** Hydrogen bond geometry for **8** [Å and °].

| D-H...A                   | d(D-H) | d(H...A) | d(D...A) | <(DHA) |
|---------------------------|--------|----------|----------|--------|
| N2-H1A...Cl1 <sup>A</sup> | 0.88   | 2.46     | 3.012(3) | 120.9  |
| N2-H1A...Cl1 <sup>B</sup> | 0.88   | 2.62     | 3.272(3) | 132.1  |

Symmetry transformations used to generate equivalent atoms: <sup>A</sup> -x+1,-y,-z <sup>B</sup> x,y+1,z.

**Table HB3:** Hydrogen bond geometry for [**H<sub>2</sub>pz**]<sub>2</sub>[PtCl<sub>6</sub>]**·2H<sub>2</sub>O** [Å and °].

| D-H...A                         | d(D-H) | d(H...A) | d(D...A) | <(DHA) |
|---------------------------------|--------|----------|----------|--------|
| N(1)-H(1A)...O(1) <sup>A</sup>  | 0.88   | 1.83     | 2.684(6) | 164.5  |
| N(2)-H(2A)...O(2) <sup>B</sup>  | 0.88   | 1.99     | 2.790(7) | 151.1  |
| N(2)-H(2A)...Cl(3) <sup>B</sup> | 0.88   | 2.88     | 3.420(5) | 121.7  |
| N(3)-H(3A)...Cl(5) <sup>C</sup> | 0.88   | 2.47     | 3.206(5) | 141.0  |
| N(3)-H(3A)...Cl(6) <sup>C</sup> | 0.88   | 2.70     | 3.358(5) | 132.2  |
| N(3)-H(3A)...Cl(4) <sup>D</sup> | 0.88   | 2.81     | 3.440(6) | 130.2  |
| N(4)-H(4B)...O(2) <sup>A</sup>  | 0.88   | 1.86     | 2.709(6) | 163.0  |

Symmetry transformations used to generate equivalent atoms: <sup>A</sup> x, y, z <sup>B</sup> x,y+1,z-1 <sup>C</sup> -x,-y+1,-z+2 <sup>D</sup> x,y,z+1

**Table HB4:** Hydrogen bond geometry for  **$\beta$ -11** [Å and °].

| D-H...A                           | d(D-H) | d(H...A) | d(D...A)  | <(DHA) |
|-----------------------------------|--------|----------|-----------|--------|
| N(2)-H(12A)...Cl(1) <sup>B</sup>  | 0.88   | 2.46     | 3.241(18) | 148.5  |
| N(4)-H(14A)...Cl(6) <sup>A</sup>  | 0.88   | 2.53     | 3.356(16) | 156.1  |
| N(4)-H(14A)...Cl(8) <sup>C</sup>  | 0.88   | 2.92     | 3.408(15) | 116.7  |
| N(8)-H(8A)...Cl(8) <sup>A</sup>   | 0.88   | 2.54     | 3.294(18) | 143.7  |
| N(8)-H(8A)...Cl(6) <sup>D</sup>   | 0.88   | 2.91     | 3.521(16) | 128.1  |
| N(10)-H(16B)...Cl(1) <sup>A</sup> | 0.88   | 2.38     | 3.220(17) | 160.0  |
| N(12)-H(10A)...Cl(6) <sup>E</sup> | 0.88   | 2.65     | 3.36(2)   | 138.3  |
| N(14)-H(4B)...Cl(3) <sup>A</sup>  | 0.88   | 2.74     | 3.584(19) | 160.2  |
| N(16)-H(2A)...Cl(4) <sup>A</sup>  | 0.88   | 2.38     | 3.225(14) | 160.7  |

Symmetry transformations used to generate equivalent atoms: <sup>A</sup> x, y, z <sup>B</sup> -x, -y, -z+1 <sup>C</sup> x, y, z+1 <sup>D</sup> x, y, z-1 <sup>E</sup> -x+1, -y+1, -z+1

**Table HB5:** Hydrogen bond geometry for **10** [Å and °].

| D-H...A                         | d(D-H) | d(H...A) | d(D...A) | <(DHA) |
|---------------------------------|--------|----------|----------|--------|
| N(4)-H(4B)...Cl(2) <sup>B</sup> | 0.86   | 2.46     | 3.32     | 177.6  |
| N(3)-H(3A)...Cl(1) <sup>A</sup> | 0.89   | 2.53     | 3.40     | 170.3  |

Symmetry transformations used to generate equivalent atoms: <sup>A</sup> x, y, z <sup>B</sup> -x, 1-y, -1-z

### 3 TGA traces

TGA diagram for  $[\text{H}_2\text{im}]_2[\text{PdCl}_4]$  **1**.

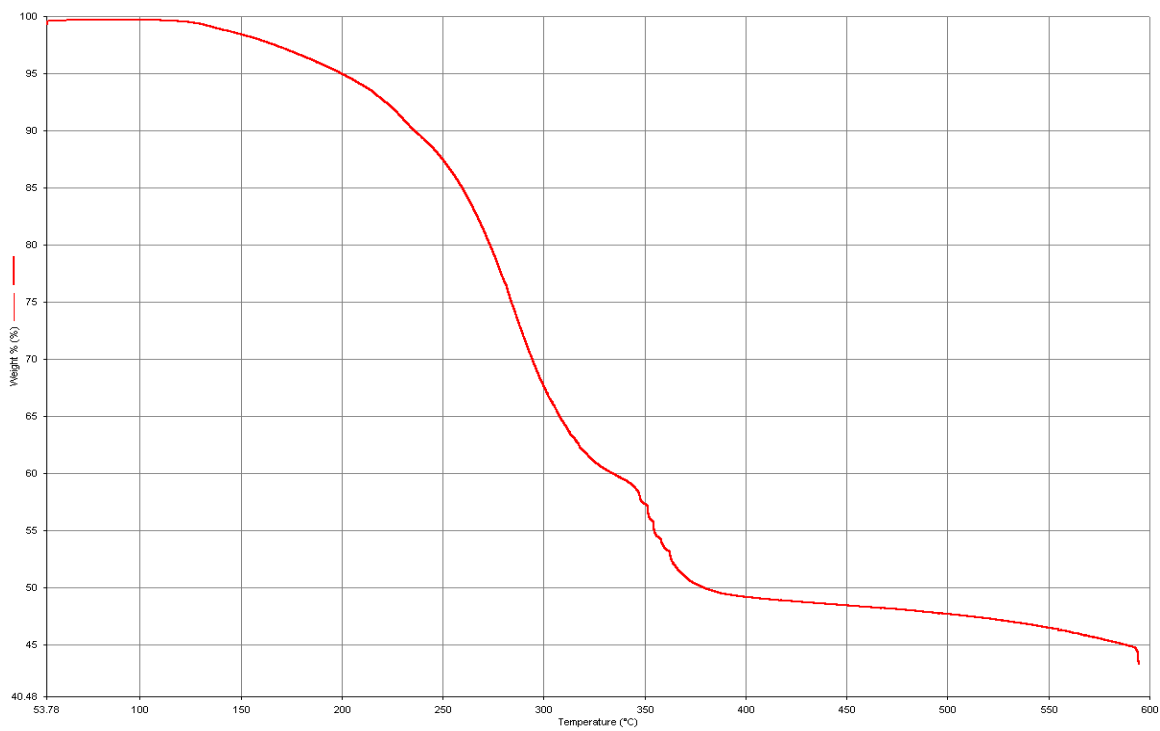

TGA diagram for  $[\text{H}_2\text{im}]_2[\text{PtCl}_4]$  **5**.

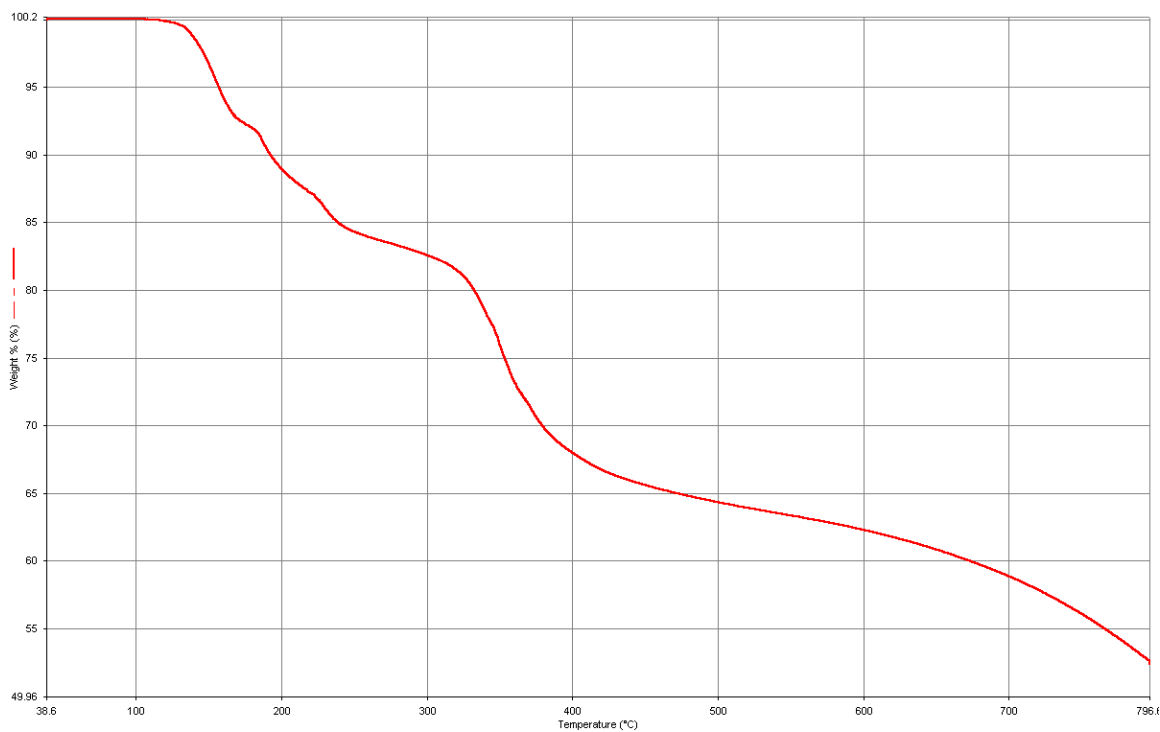

TGA diagram for  $[\text{H}_2\text{pz}]_2[\text{PdCl}_4]$  **7**.

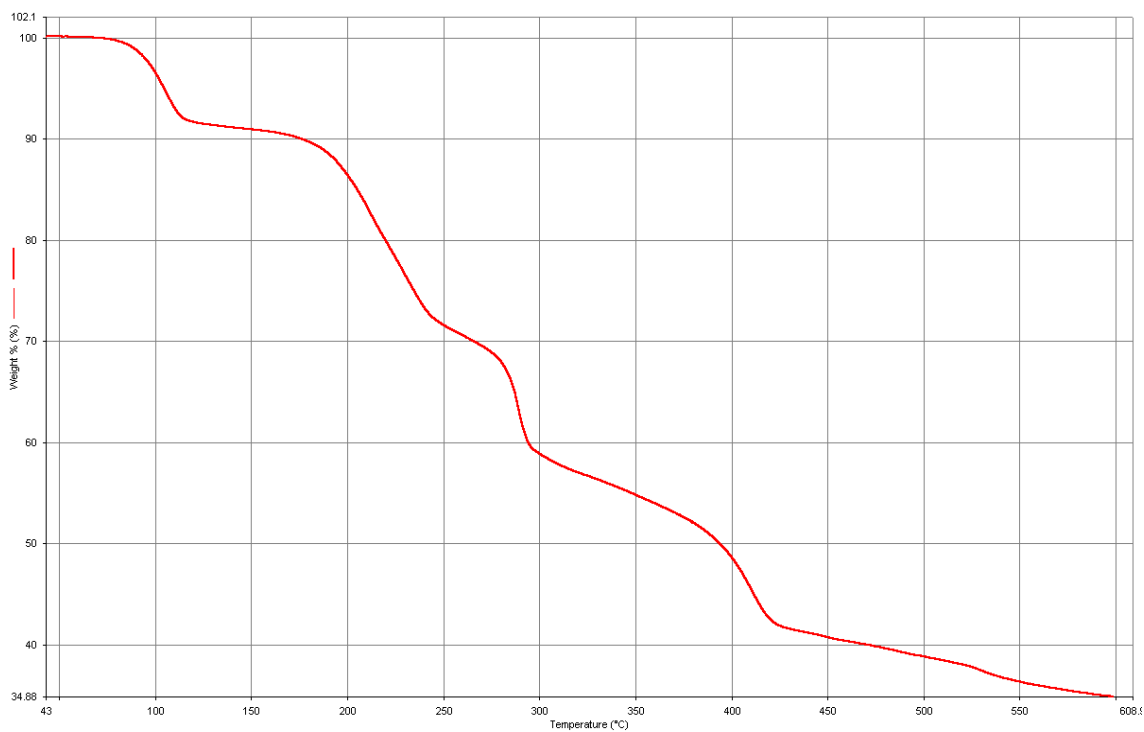

TGA diagram for  $[\text{H}_2\text{pz}]_2[\text{PdCl}_4]$  **10**.

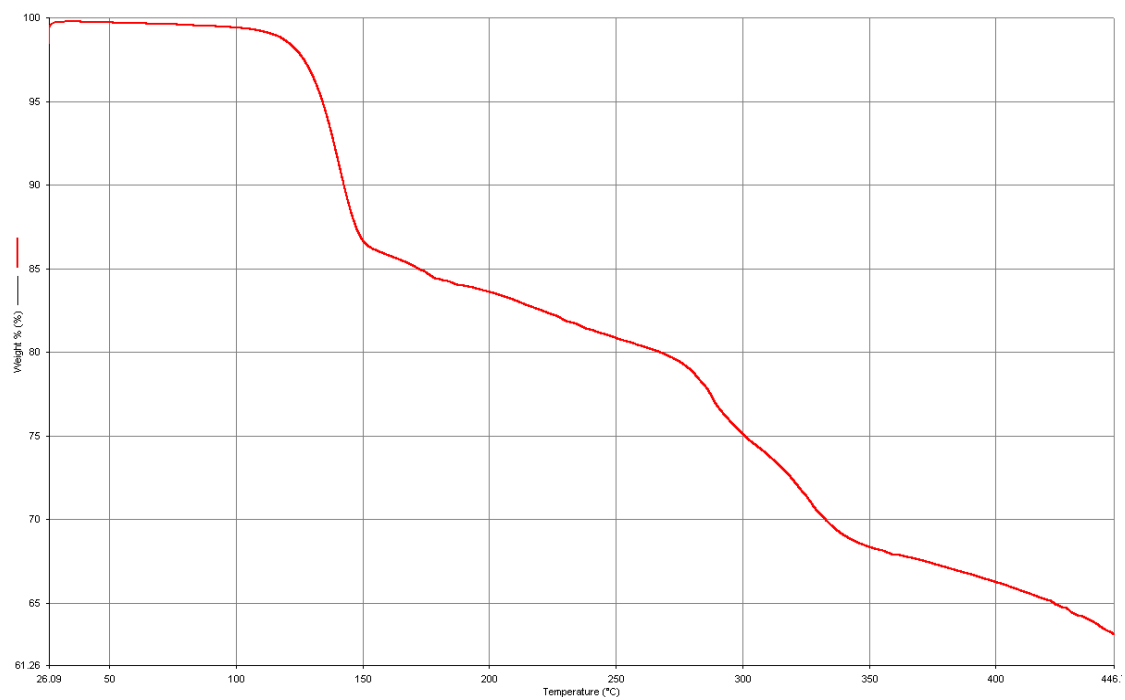

Supplement: b919665j.pdf [file b919665j.pdf]
